# Supplementary material for: Natural history and molecular evolution of demersal Mediterranean sharks and skates inferred by comparative phylogeographic and demographic analyses
Source: PeerJ. 2018 Sep 18;6:e5560. doi: 10.7717/peerj.5560 (PMC6149499; doi:10.7717/peerj.5560)
Supplement: Table S2 — PCR and sequencing primers. Primer pairs and annealing temperatures (Ta) used to amplify and sequencing the three mitochondrial DNA fragments in the four elasmobranch species. The annealing temperatures for the PCR reactions are also reported. GM= G. melastomus; SC, S. canicula; RC, R. clavata; RM, R. miraletus. [file peerj-06-5560-s002.xlsx]

## Sheet: Sheet1
Gene	Primer name	Sequence (5’-3’)	Species	Ta	Reference
COI	FISHF1	TCAACCAACCACAAAGACATTGGCAC	GM	54°C	Ward et al., 2005
	FISHR1	TAGACTTCTGGGTGGCCAAAGAATCA
	FISHF2	TCGACTAATCATAAAGATATCGGCAC	RC, RM, SC	54°C	Ward et al., 2005
	FISHR2	ACTTCAGGGTGACCGAAGAATCAGAA
CR	RclaintF	CACCAATTTTGACGTGTTAG	RC	54°C	Pasolini et al., 2011
	RclaintR	AATGAGATGGGGTAATTGAG
	ElasmoCR15642F	TTGGCTCCCAAAGCCAARATTCTG	RM, GM, SC	52°C	Stoner et al., 2003
	ElasmoCR16638R	CCCTCGTTTTWGGGGTTTTTCGAG
NADH2	ND2-Ile F	CCGGATCACTTTGATAGAGT	GM	45°C	Castilho et al., 2007
	ND2-Asn R	CGCGTTTAGCTGTTAACTAA
	NADH2 S.canicula F	GCCATGTTGGTTAAATTCCTTCCT	SC	65°C	Present study
	NADH2 S.canicula R	TTCGCTGGCTTGAACGCTTA
	NADH2 Skates F	GCCCATACCCCTACCATGT	RC, RM	55°C	Present study
	NADH2 Skates R	GCTTTGAAGGCTTTTGGT
